# Supplementary material for: Circadian disruption of core body temperature in trauma patients: a single-center retrospective observational study
Source: PubMed Central journal article supplement (PMC6945723; doi:10.1186/s40560-019-0425-x), 2020-01-06

## Fourier Transformation

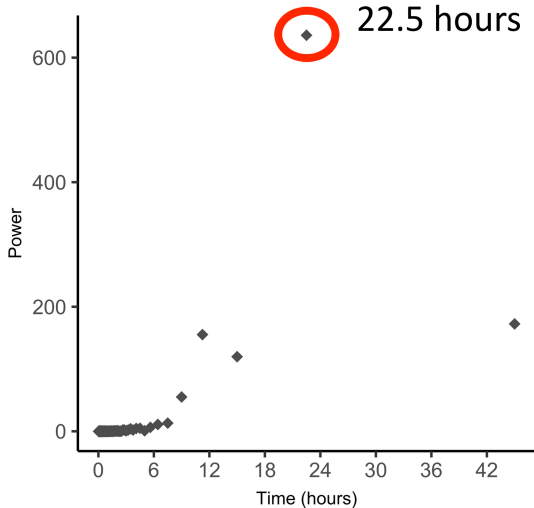

## Cosinor Analysis

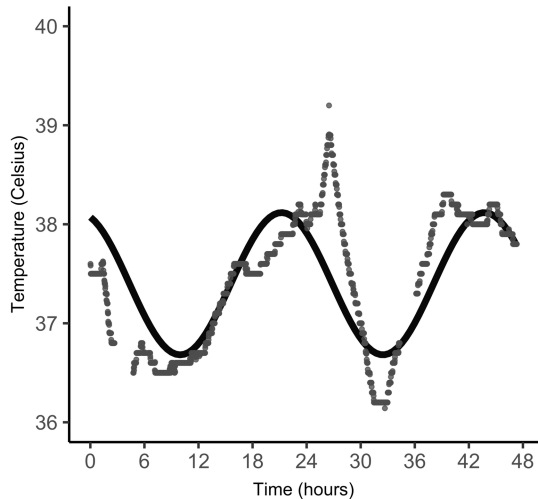

Supplement: 40560_2019_425_MOESM1_ESM.pdf [file 40560_2019_425_MOESM1_ESM.pdf]
